# Supplementary material
Source: HighWire-hosted journal article supplement (https://jitc.bmj.com/content/12/6/e008613)

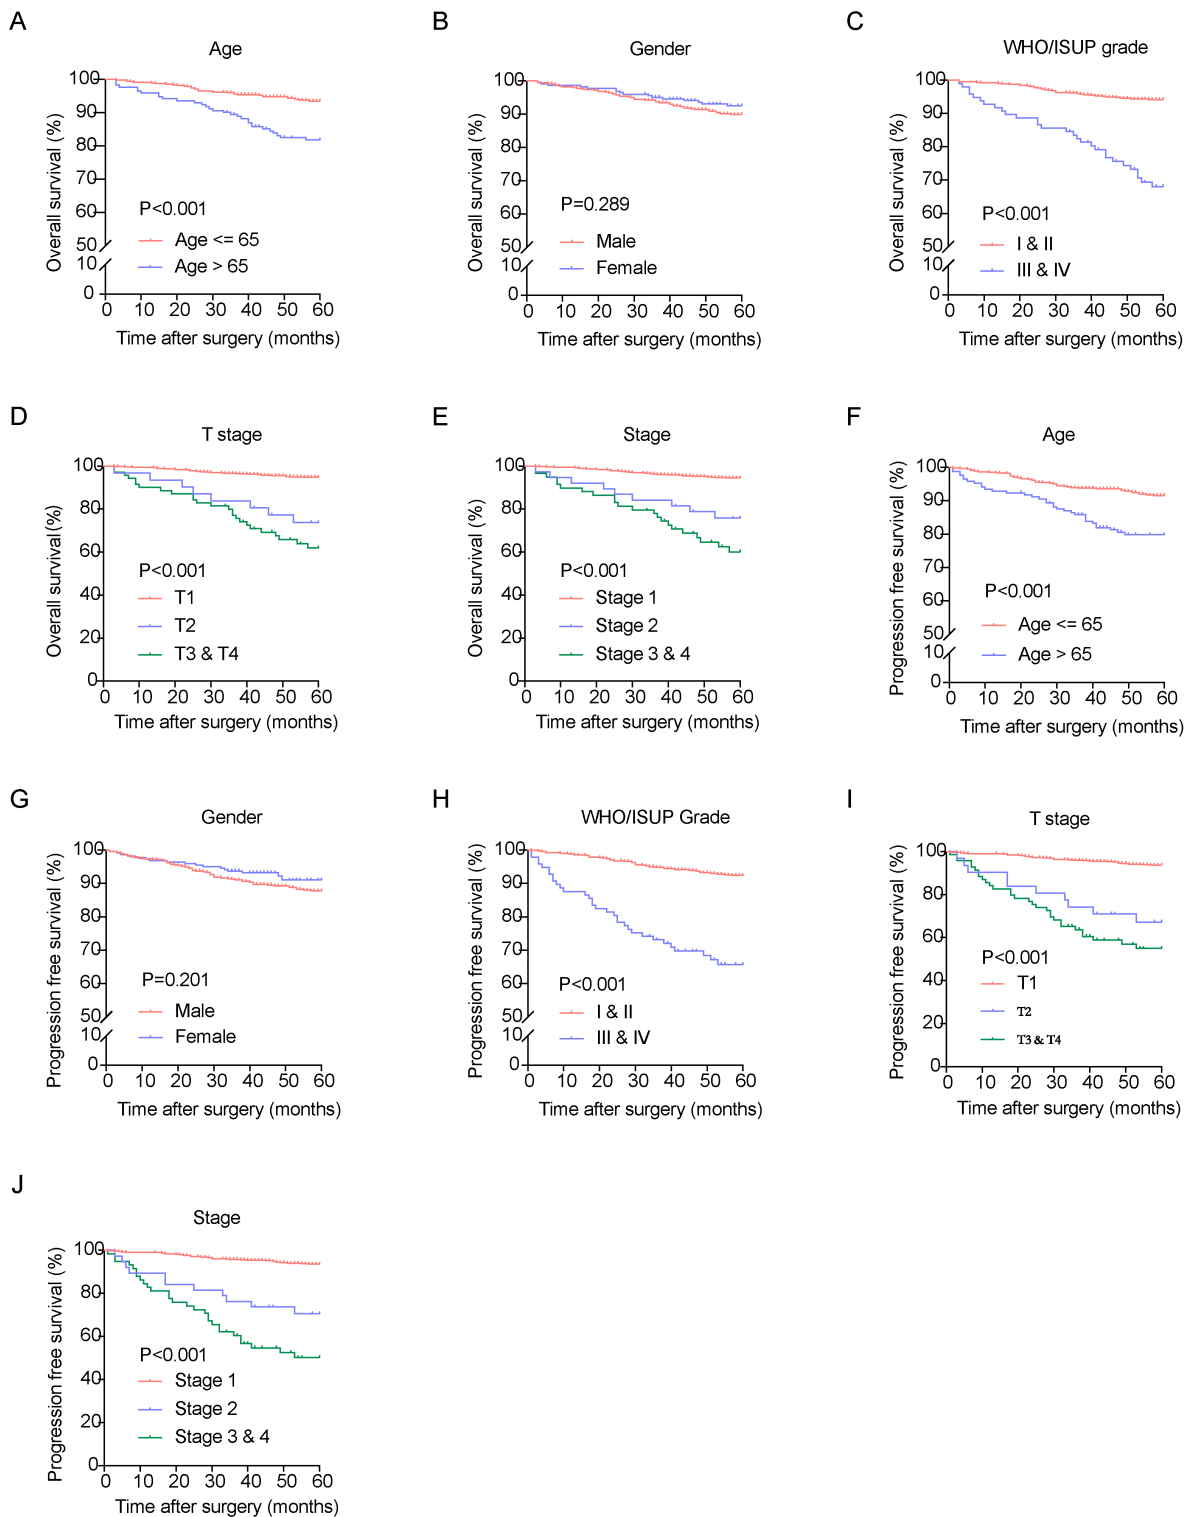

Supplement: inline-supplementary-material-2 [file inline-supplementary-material-2.pdf]

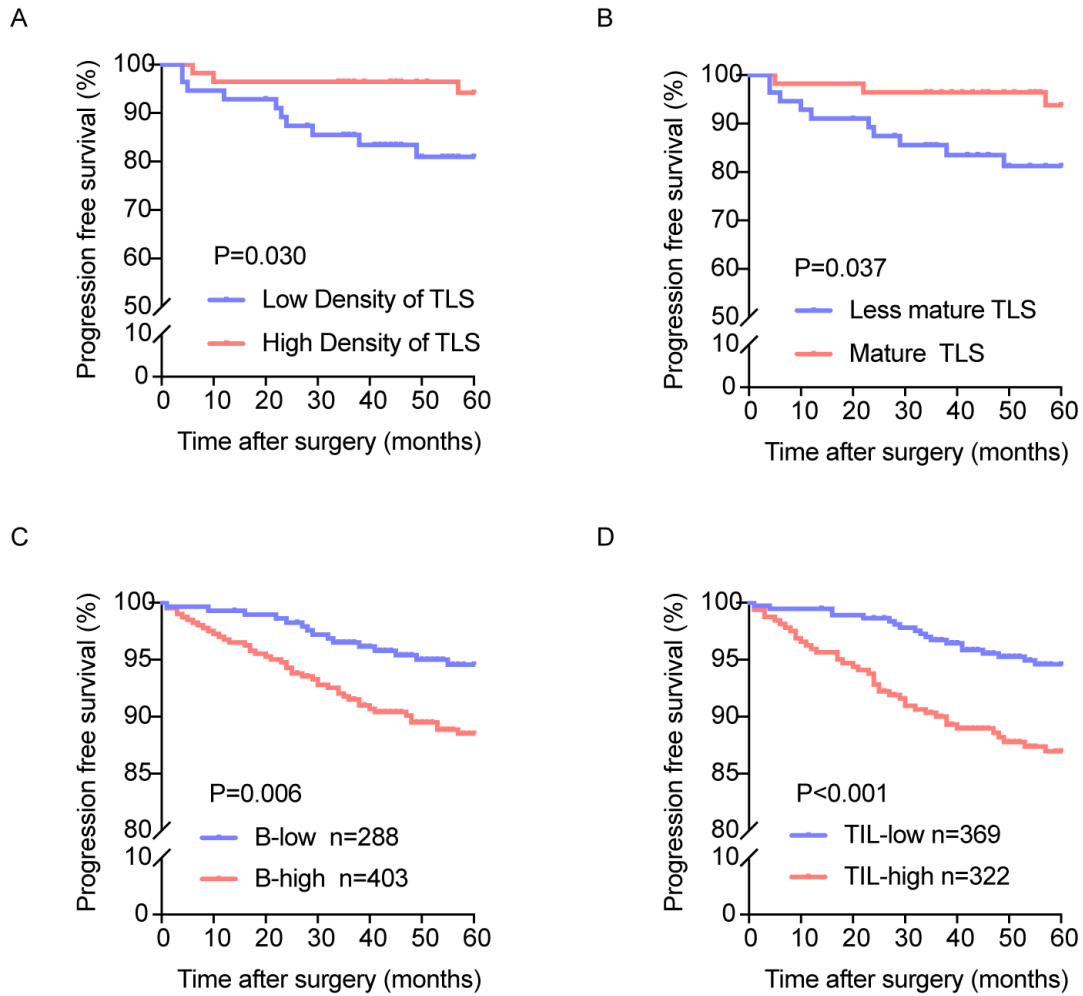

Supplement: inline-supplementary-material-5 [file inline-supplementary-material-5.pdf]

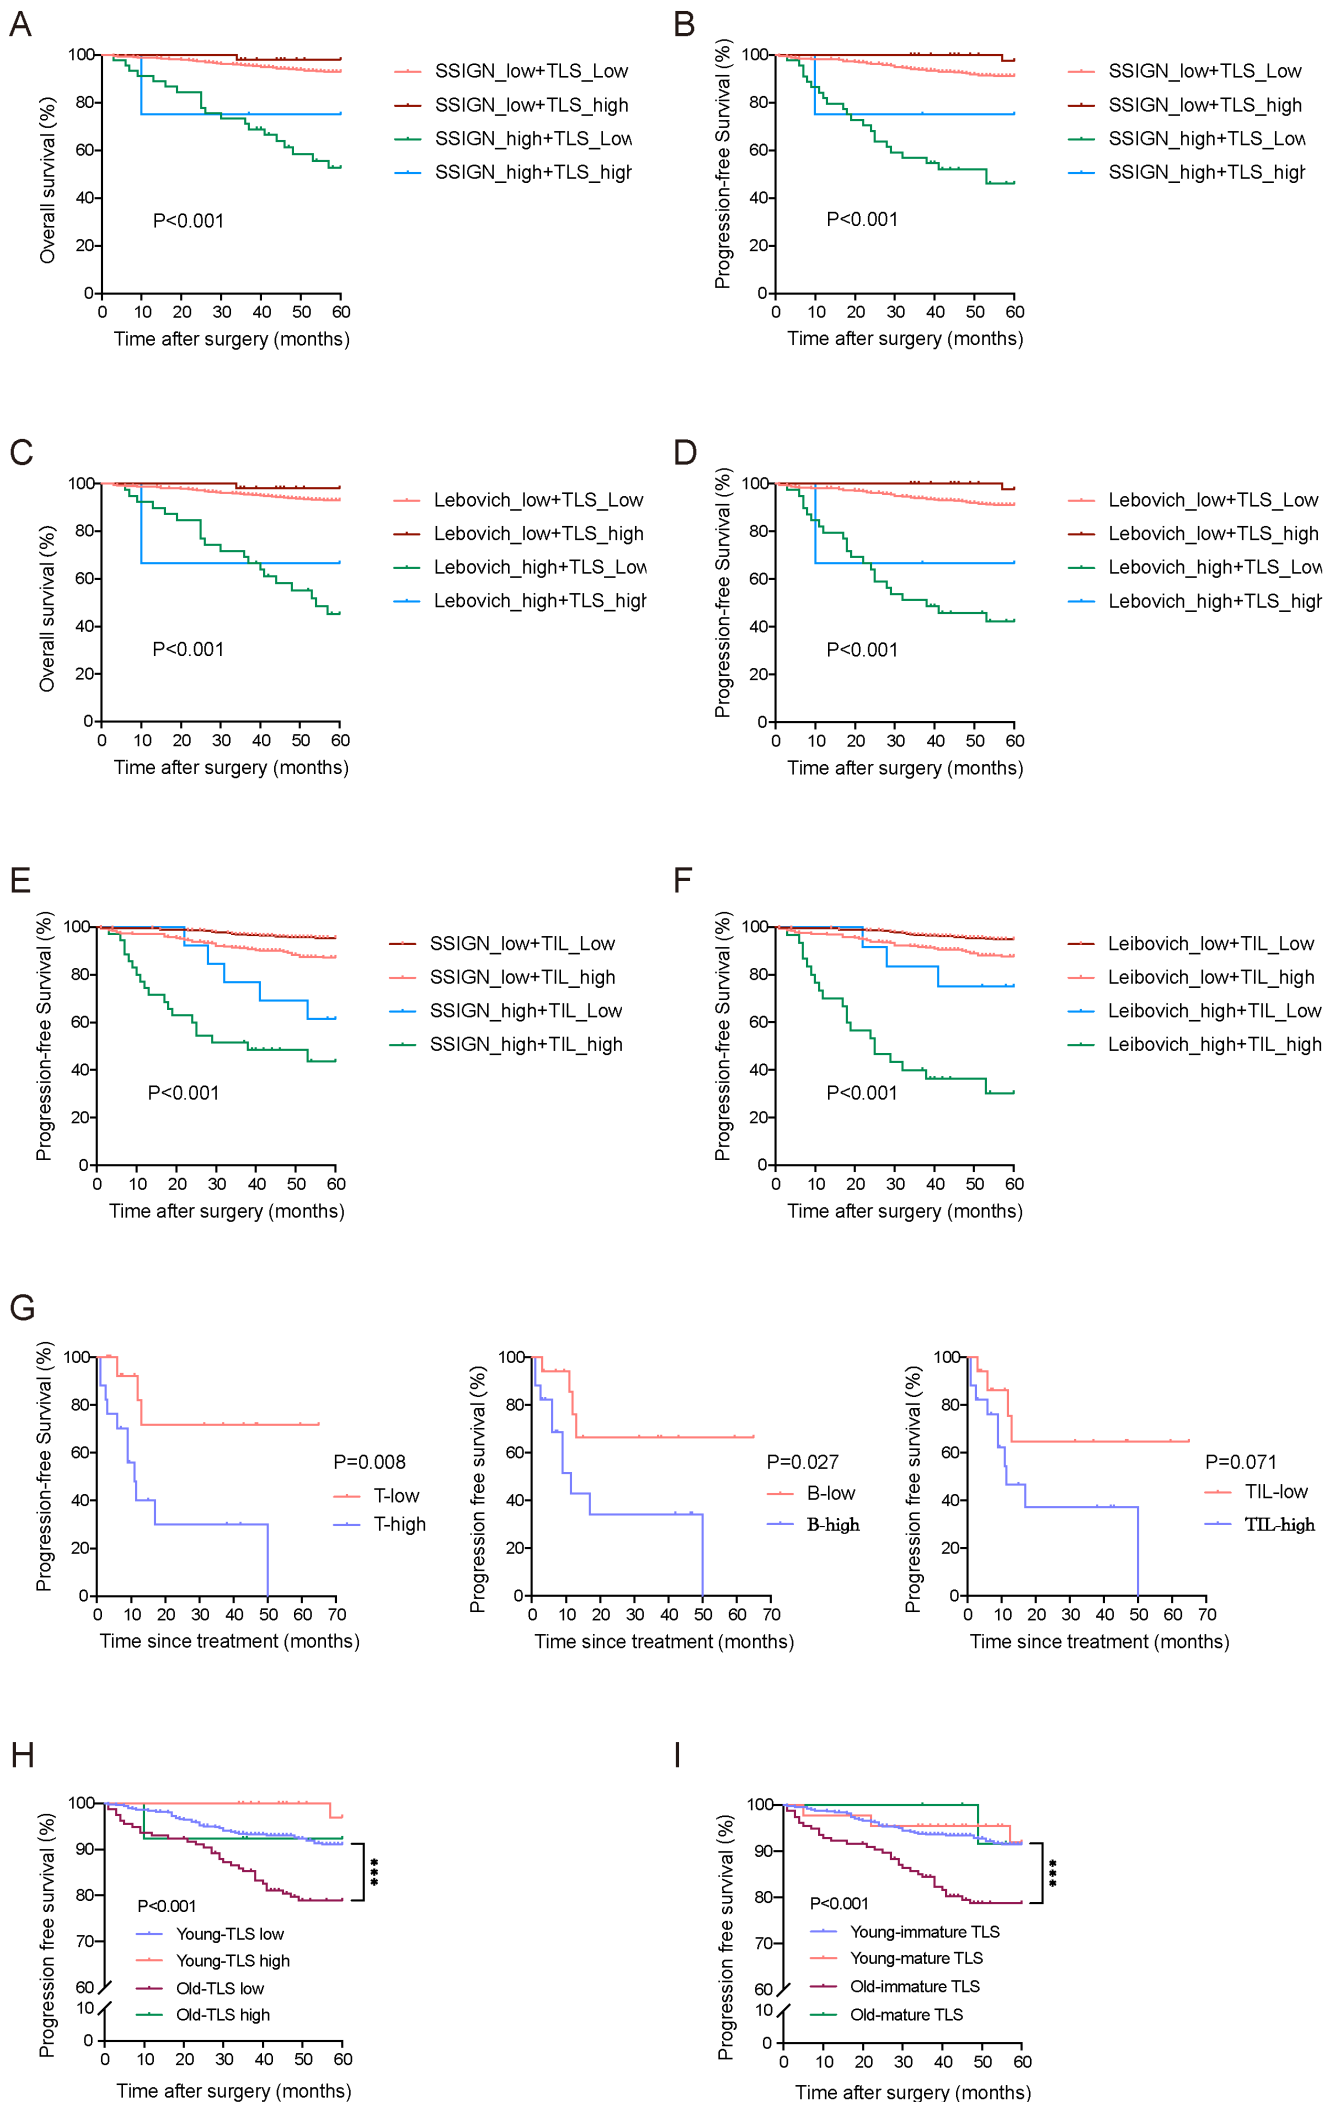

Supplement: inline-supplementary-material-7 [file inline-supplementary-material-7.pdf]
